October 27–29  
1968

**XI. Congress of the Polish Society of Urology  
at Łódź, Poland**

27.10.: Symposium: Cancer of the bladder.

28.10.: Recent advances in the urological radiodiagnostics.

29.10.: Organization of the urological health service and the urological teaching and training.

*Organizing Committee:* Prof. Dr. med. L. MAZUREK, Klinika Urologiczna AM, Kopcińskiego 22, Łódź, Poland.

---

## Varia

---

### Training Program in Reproductive Biology

Applications for postdoctoral fellowships in reproductive physiology at the Harbor General Hospital (University of California, Los Angeles) are now being accepted for the year beginning July 1, 1968.

The program, sponsored jointly by the U.S.P.H.S and the Ford Foundation, is designed to stress on interdisciplinary approach to the biology of early reproduction, from spermatogenesis through embryo development, and includes programs in electron microscopy, biochemistry and primate physiology. The first three months are devoted largely to didactic lectures and laboratory exercises oriented toward basic research techniques and concepts. The major portion of the year is devoted to research work under the supervision of a faculty member.

Basic research on the physiology, biochemistry, metabolism, pathology and ultra-structure of reproductive tissues is emphasized. Clinical research is not stressed, but the location of the program in a hospital makes such research possible.

United States citizenship is not required for fellows supported by the Ford Foundation. Fellows supported by the United States Public Health Service must be U.S. citizens or have permanent resident status.

Candidates should have the M.D. or the Ph.D. degree.

Inquiries should be addressed to A.T.K. COCKETT, M.D., Head, Department of Surgery/Urology, or DANIEL R. MISHELL, Jr., M.D., Department of Obstetrics and Gynecology, Harbor General Hospital, Torrance, California 90509 (USA).
